# Supplementary material for: Soft-tissue and dermal arrangement in the wing of an Early Cretaceous bird: Implications for the evolution of avian flight
Source: PubMed Central journal article supplement (PMC4594305; doi:10.1038/srep14864), 2015-10-06
Supplement: srep14864-s1.pdf [file srep14864-s1.pdf]

# **Soft-tissue and dermal arrangement in the wing of an Early Cretaceous bird: Implications for the evolution of avian flight**

**Guillermo Navalón<sup>1,2</sup>, Jesús Marugán-Lobón<sup>2,3</sup>, Luis M. Chiappe<sup>3\*</sup>, José Luis Sanz<sup>2</sup>,  
Ángela D. Buscalioni<sup>2</sup>**

**1** School of Earth Sciences, University of Bristol, Wills Memorial Building, Queens Road, Bristol, BS8 1RJ, UK.

**2** Unidad de Paleontología, Facultad de Ciencias, Universidad Autónoma de Madrid, Campus de Cantoblanco, Madrid, Spain.

**3** Dinosaur Institute, Natural History Museum of Los Angeles, 900 Exposition Boulevard, Los Angeles, CA 90007, U.S.A.

\*corresponding author: [lchiappe@nhm.org](mailto:lchiappe@nhm.org)

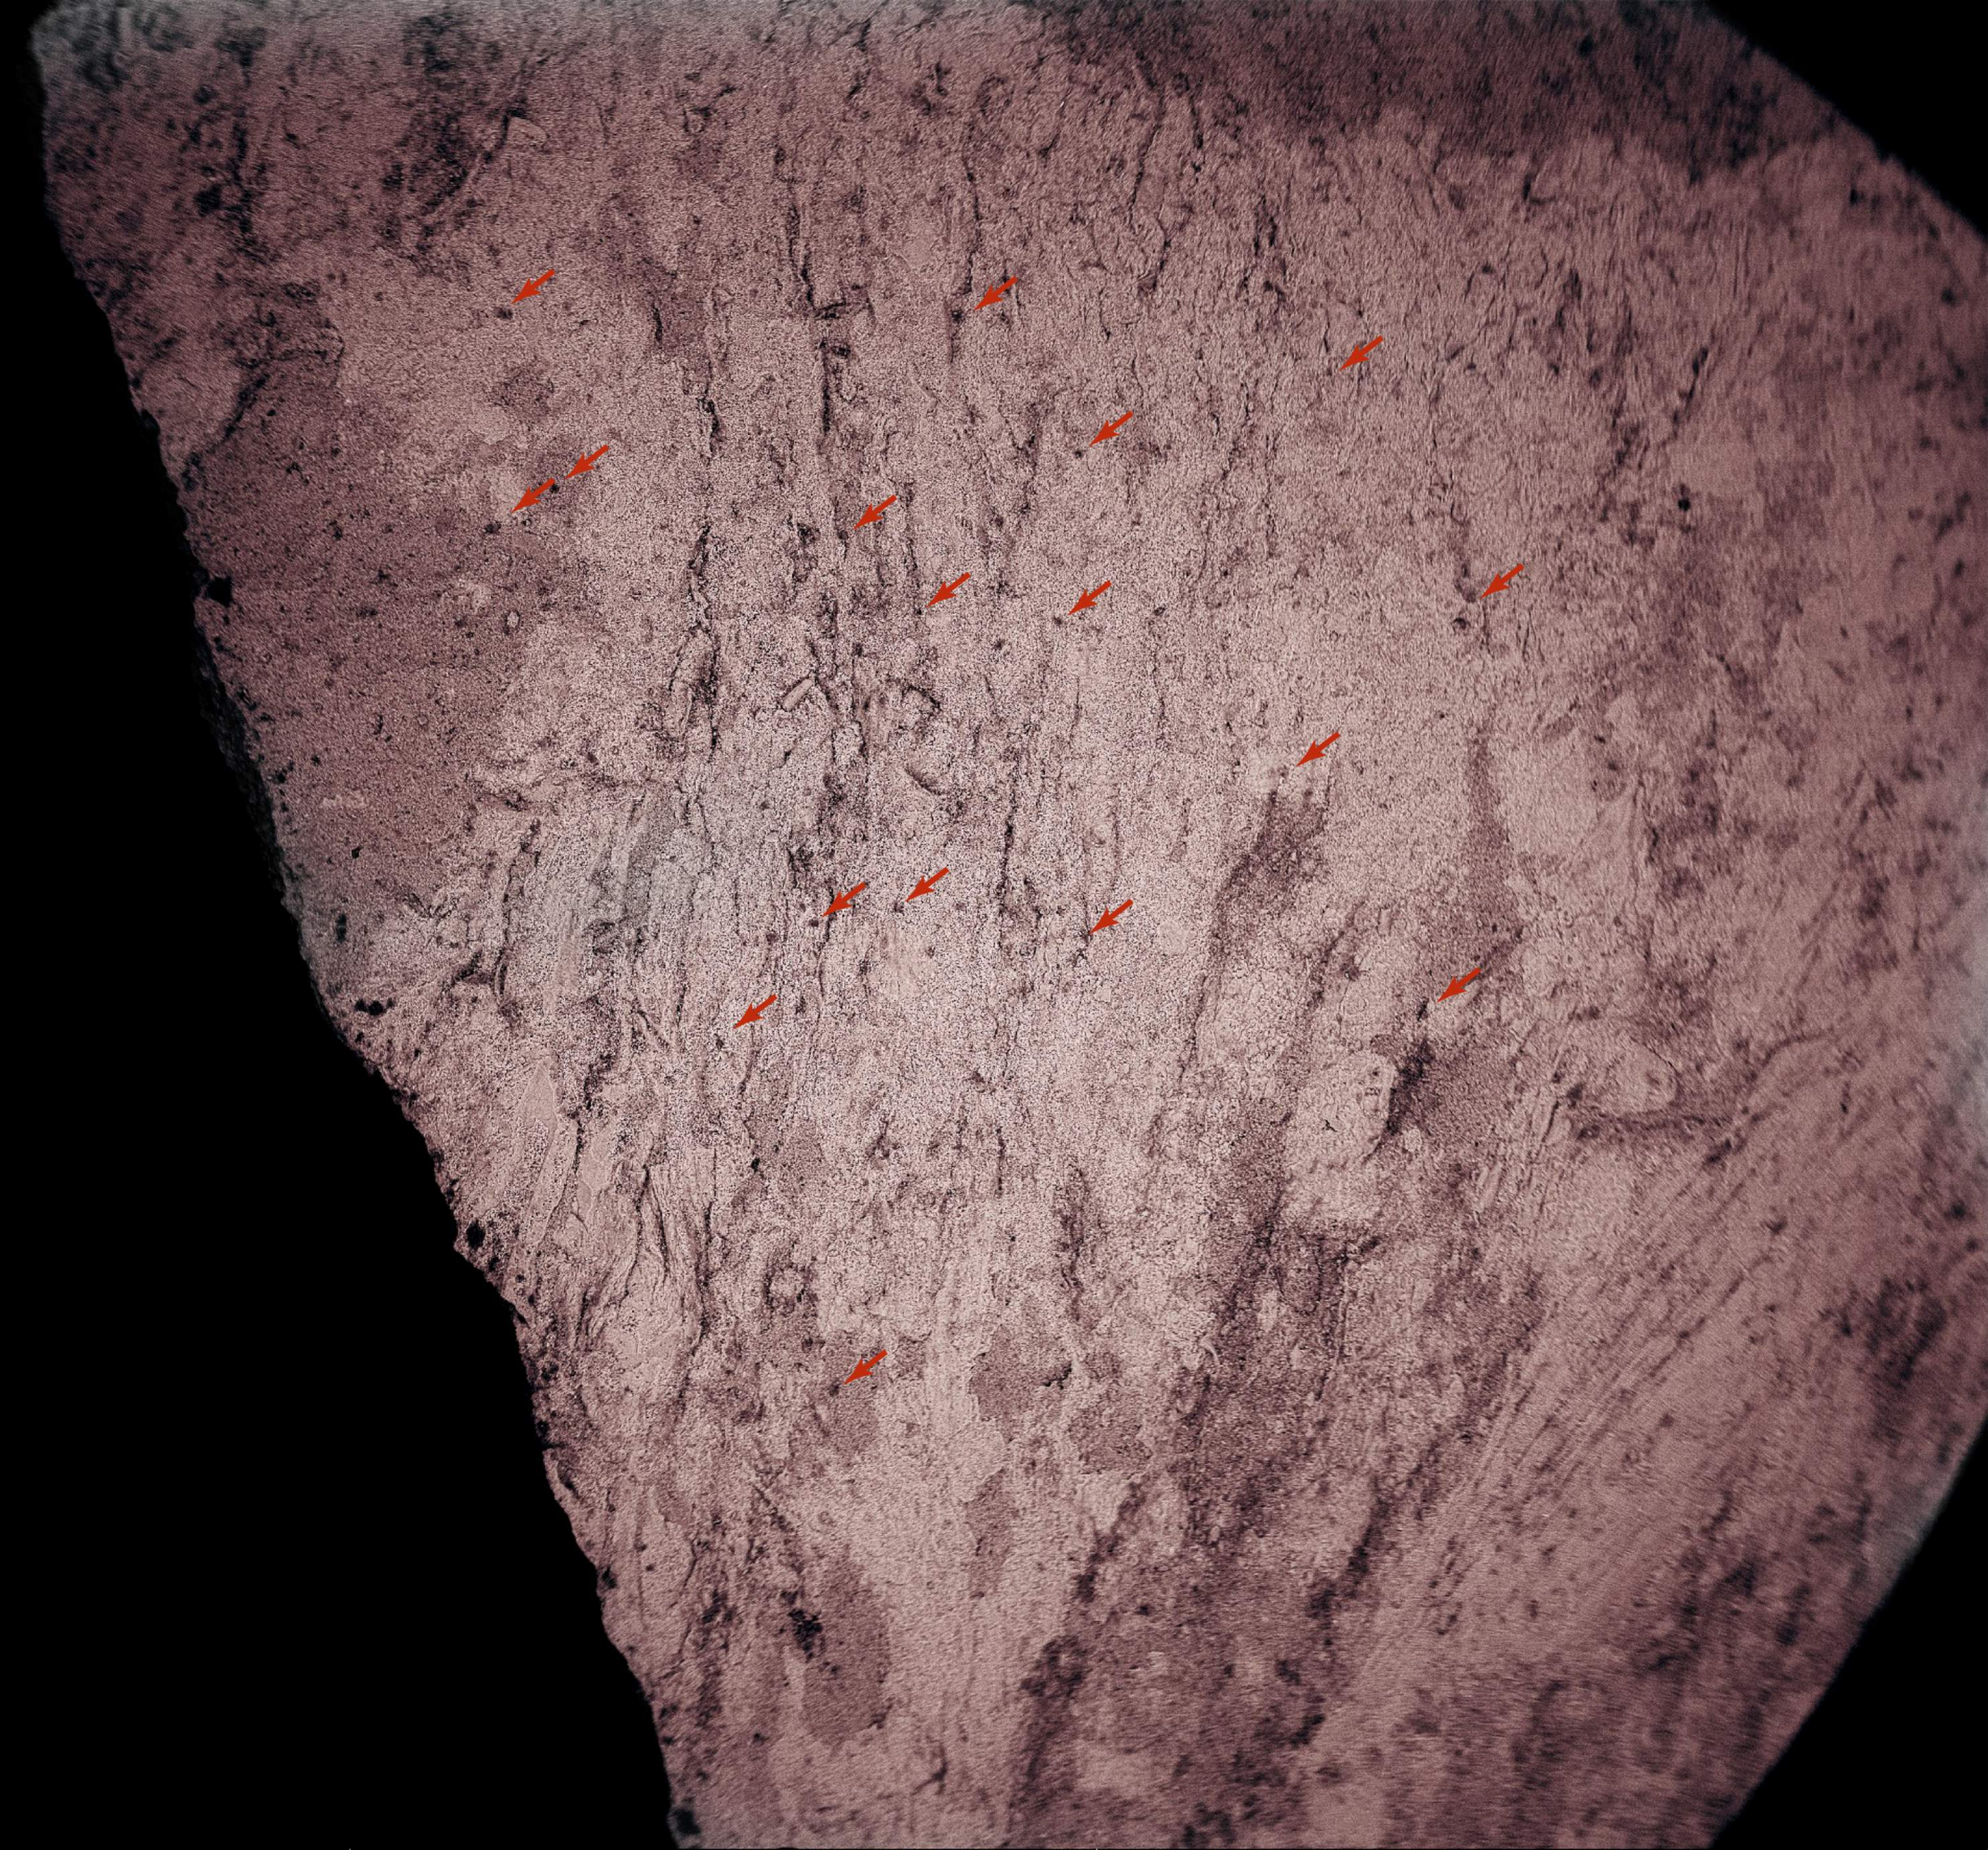

2.0mm

**Figure S1. Scattered pattern of follicles in the propatagium of MCCMLH31444 (SEM).** Red arrows indicate the location of some follicles.
